# Supplementary material
Source: PubMed Central journal article supplement (PMC4613967)
Supplement: supp_db15-0728_DB150728SupplementaryData.pdf [file supp_db15-0728_DB150728SupplementaryData.pdf]

SUPPLEMENTARY DATA

**Supplementary Figure 1. UCP1 expression of WAT and BAT derived ADMSCs.** Differentiated ADMSCs derived from interscapular BAT plated on TCPS or perigonadal WAT derived ADMSCs plated on the Ag73 and C-16 (25:75 molar ratio) coated plates, GAPDH normalized UCP1 mRNA expression relative to WAT (n=5).

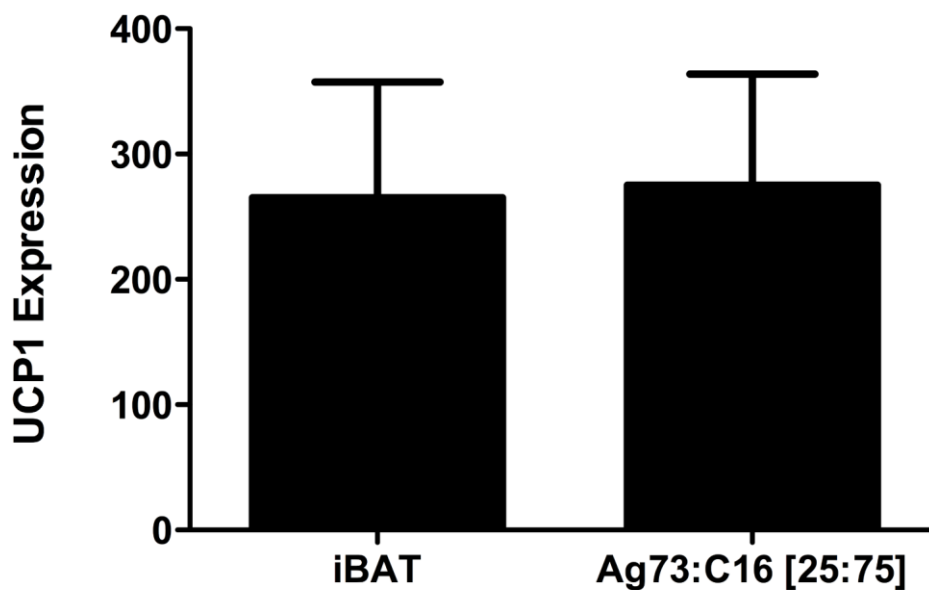

SUPPLEMENTARY DATA

**Supplementary Figure 2. UCP1 and neutral lipid staining of *in vitro* hydrogel.** IHC of differentiated ADMSCs in Ag73:C16 hydrogel with UCP1 (red) and Bodipy3922 (green).

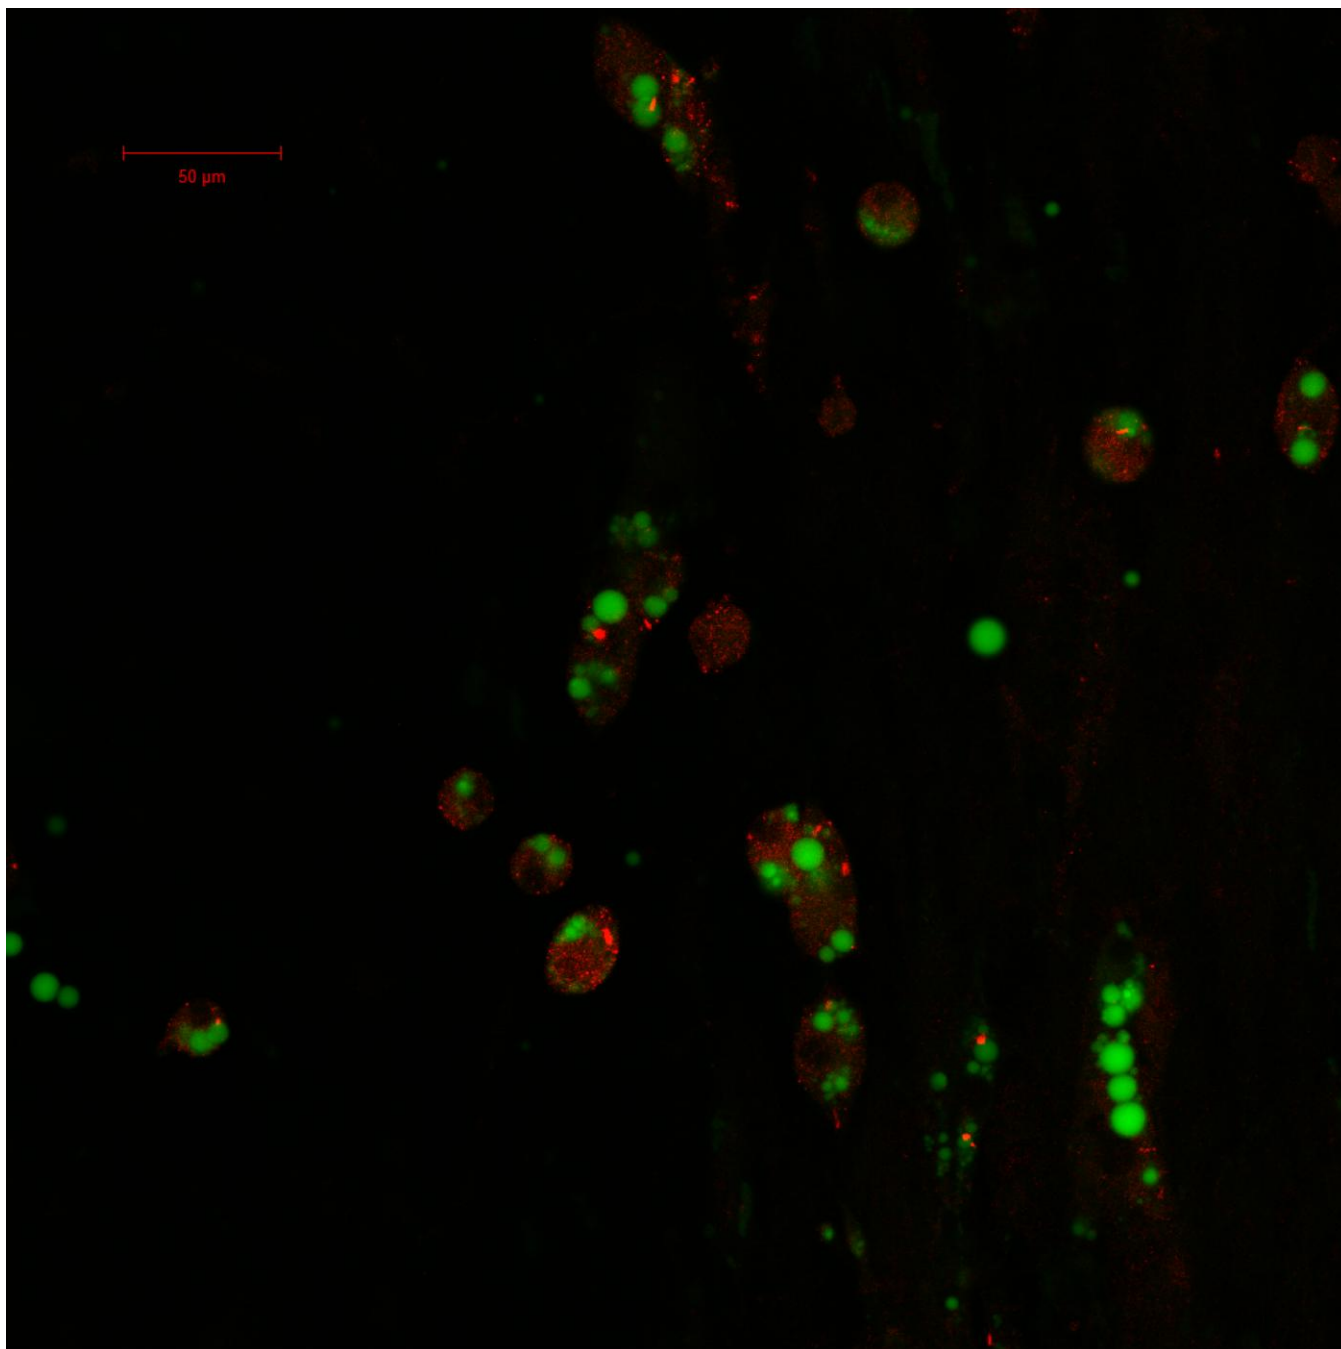

SUPPLEMENTARY DATA

**Supplementary Figure 3. Tyrosine hydroxylase expression in BAT-MACT.** Two weeks post implantation BAT-MACT were stained with DAPI (blue) and tyrosine hydroxylase specific antibodies (red).

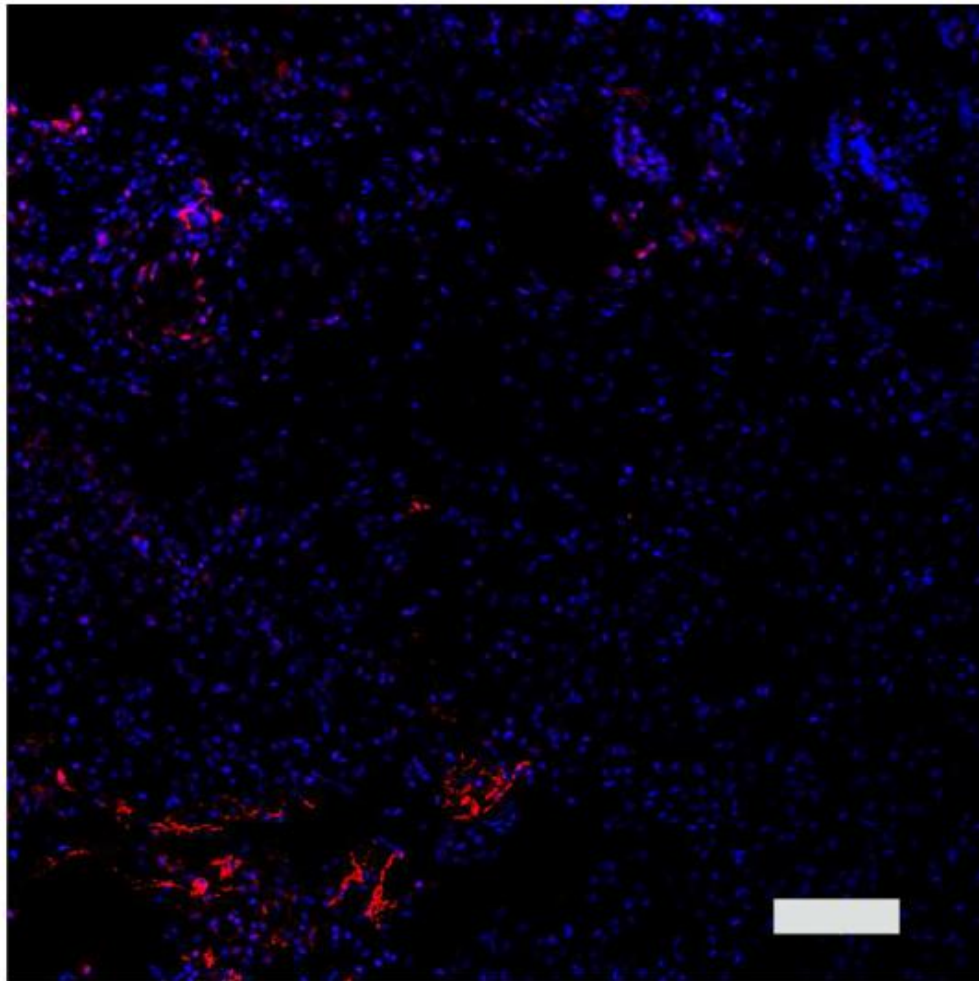

SUPPLEMENTARY DATA

**Supplementary Figure 4. UCP1 expression of BAT-MACT compared to endogenous BAT.** GAPDH normalized UCP1 mRNA expression relative to average endogenous BAT expression (n=5).

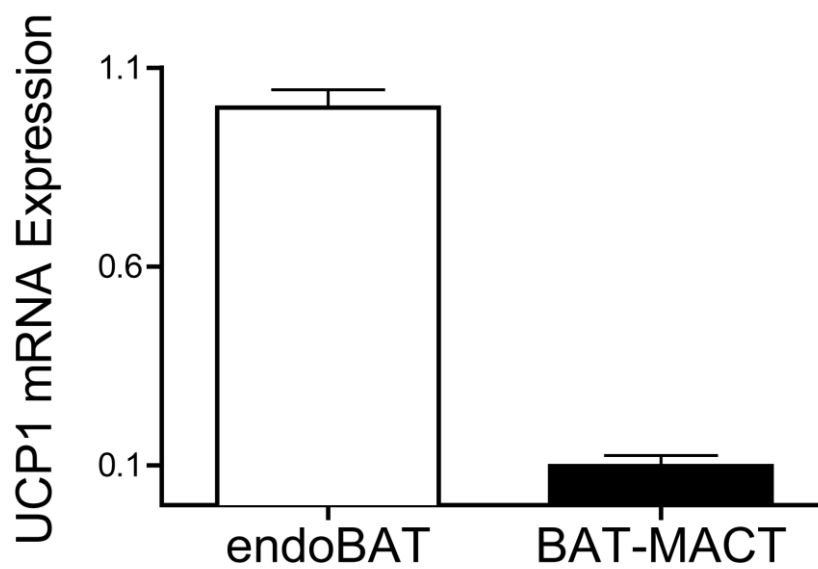

SUPPLEMENTARY DATA

**Supplementary Figure 5. WAT-MACT morphology.** Two weeks post implantation WAT-MACT were stained with DAPI (blue) and endomucin specific antibodies (red) to highlight the vasculature.

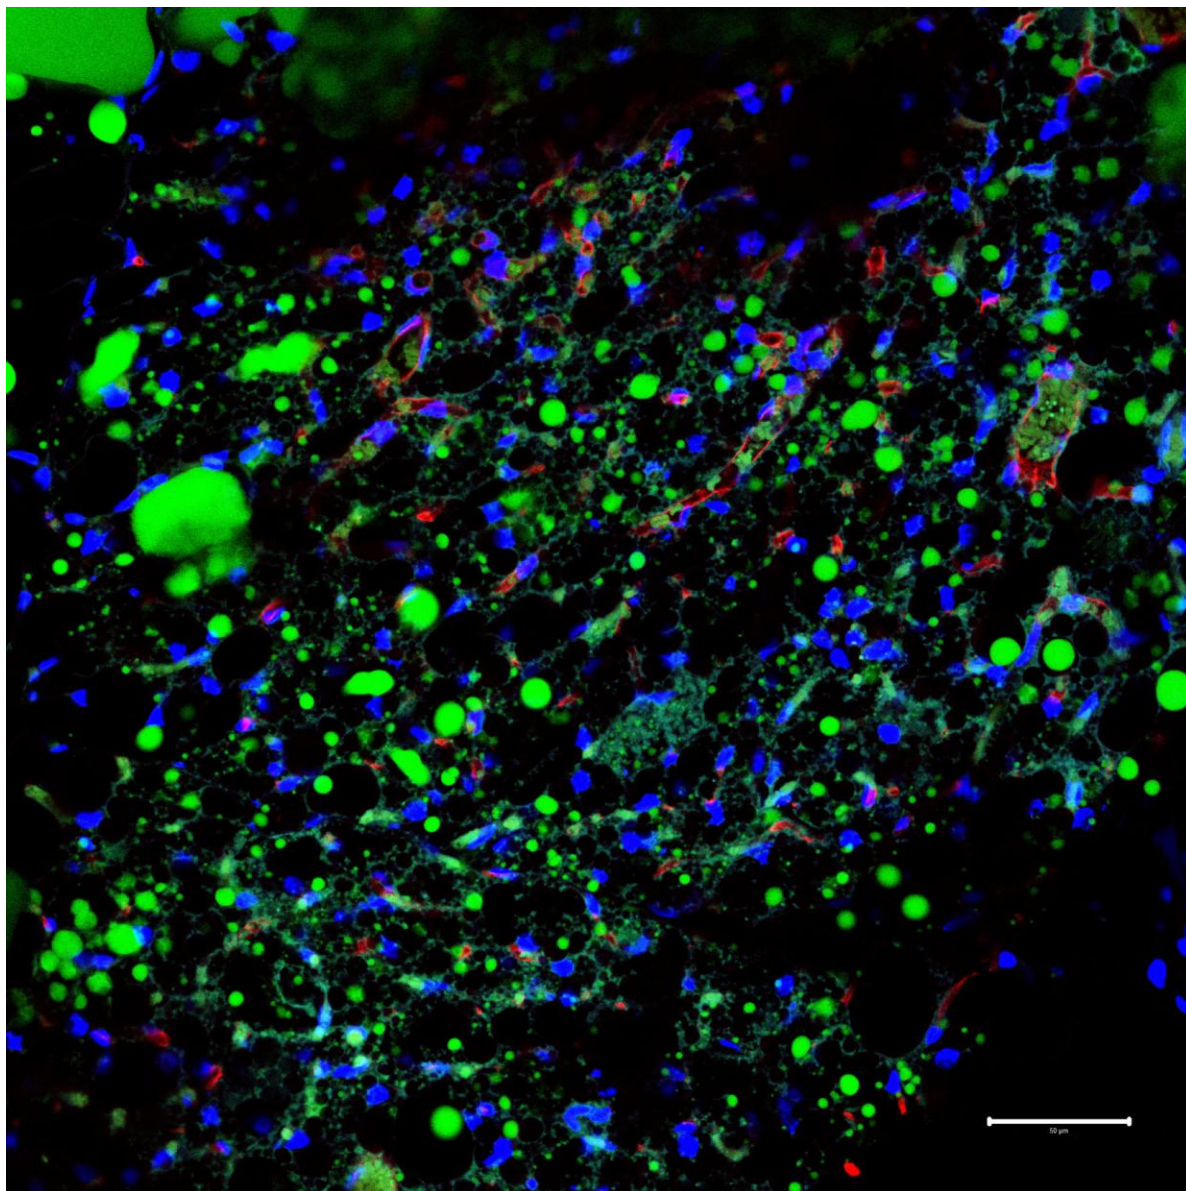

SUPPLEMENTARY DATA

**Supplementary Figure 6. Thermograph of BAT-MACT implanted animal.** BAT-MACT in area A compared to unaltered inguinal region in area B, 5 days post implantation at room temperature. Max temperature for area: A) 30.86°C B) 29.43°C.

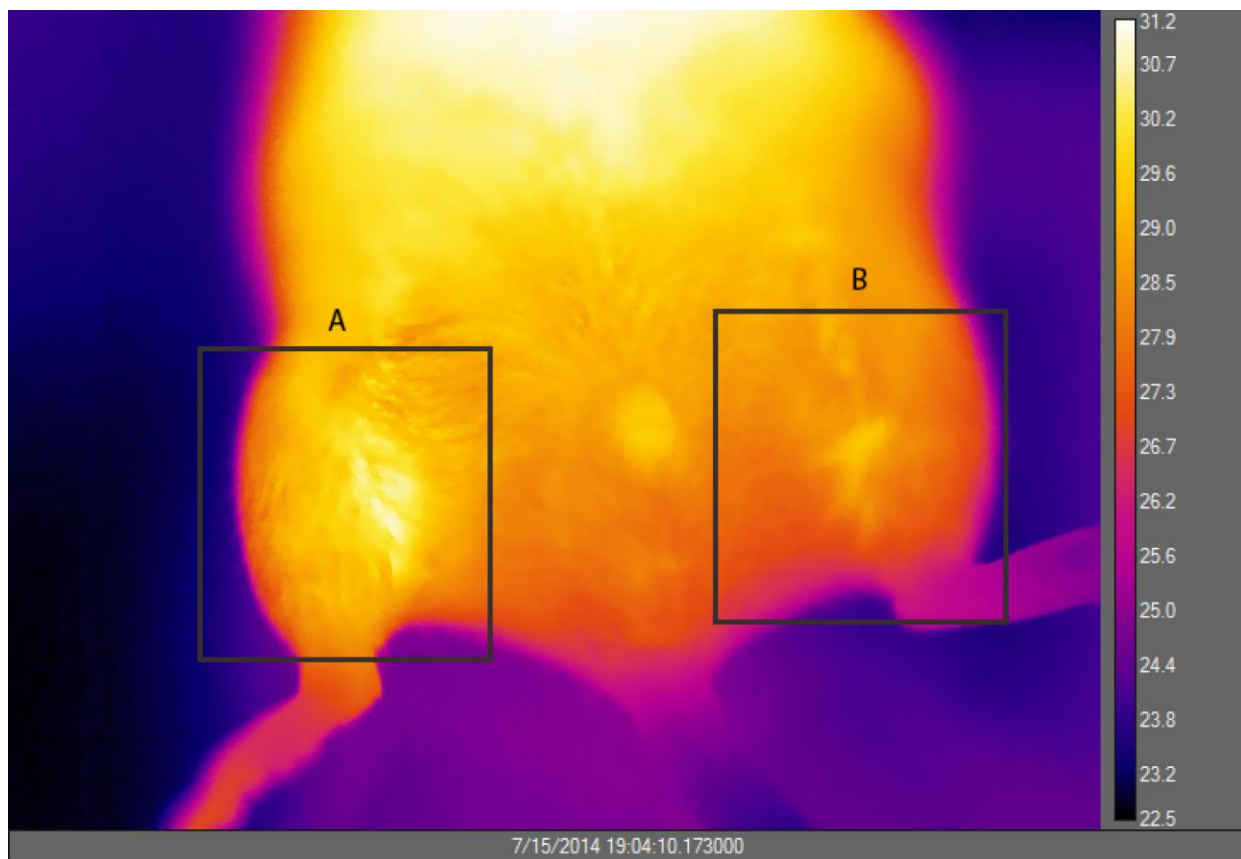

SUPPLEMENTARY DATA

**Supplementary Figure 7. Serum triglyceride concentrations of control and BAT-MACT implanted animals.** Serum triglycerides concentrations of animals from Fig. 5D.

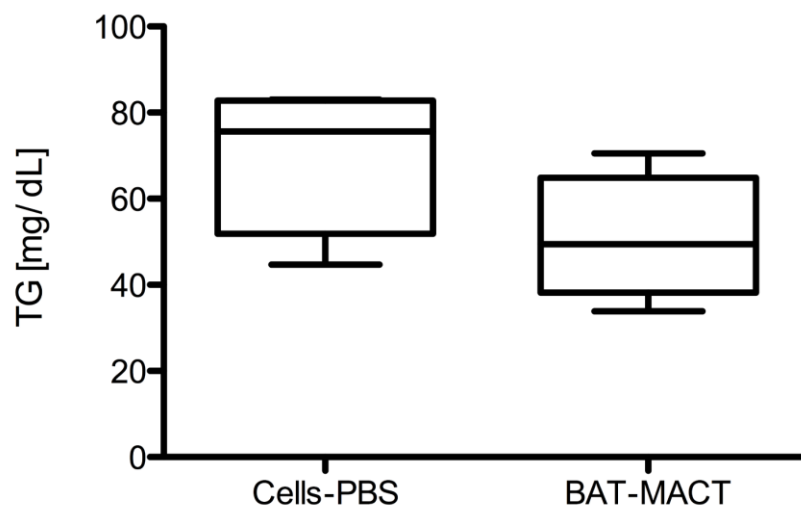

SUPPLEMENTARY DATA

**Supplementary Table 1.** Peptide targets for integrins and other adhesion receptors present on stem and progenitor cells identified via RT-PCR, IHC, or flow cytometry.

| Acronym | Peptide Sequence   | Receptor Target                    | Protein Source                           | Reference   |
|---------|--------------------|------------------------------------|------------------------------------------|-------------|
| bsp-RGD | CGNGEPRGDTYRAY     | $\alpha_v\beta_3$                  | Bone<br>sialoproteina<br>and vitronectin | [1, 2]      |
| P3      | CGGVSWFSRHRYSFPAVS | $\alpha_6\beta_1$                  | Laminin $\alpha 1$ chain                 | [3, 4]      |
| AG10    | CGGNRWHSIYITRFG    | $\alpha_6\beta_1$                  | Laminin $\alpha 1$ chain                 | [5] [6]     |
| AG32    | CGGTWYKIAFQRNRK    | $\alpha_6\beta_1$                  | Laminin $\alpha 1$ chain                 | [5] [6]     |
| AG73    | CGGRKRLQVQLSIRT    | Syndecan-1                         | Laminin $\alpha 1$ chain                 | [7] [5] [6] |
| C16     | CGGKAFDITYVRLKF    | $\alpha_v\beta_3, \alpha_5\beta_1$ | Laminin $\gamma 1$ chain                 | [8] [9]     |

1. Li, Y.J., et al., *Hydrogels as artificial matrices for human embryonic stem cell self-renewal*. J Biomed Mater Res A, 2006. **79**(1): p. 1-5.
2. Rezania, A. and K.E. Healy, *Biomimetic peptide surfaces that regulate adhesion, spreading, cytoskeletal organization, and mineralization of the matrix deposited by osteoblast-like cells*. Biotechnol Prog, 1999. **15**(1): p. 19-32.
3. Emsley, J.G. and T. Hagg, *alpha6beta1 integrin directs migration of neuronal precursors in adult mouse forebrain*. Exp Neurol, 2003. **183**(2): p. 273-85.
4. Murayama, O., H. Nishida, and K. Sekiguchi, *Novel peptide ligands for integrin alpha 6 beta 1 selected from a phage display library*. J Biochem, 1996. **120**(2): p. 445-51.
5. Nakahara, H., et al., *A mechanism for regulation of melanoma invasion - Ligation of alpha(6)beta(1) integrin by laminin G peptides*. Journal Of Biological Chemistry, 1996. **271**(44): p. 27221-27224.
6. Nomizu, M., et al., *Structure-activity study of a laminin alpha 1 chain active peptide segment Ile-Lys-Val-Ala-Val (IKVAV)*. FEBS Lett, 1995. **365**(2-3): p. 227-31.
7. Hoffman, M.P., et al., *Cell type-specific differences in glycosaminoglycans modulate the biological activity of a heparin-binding peptide (RKRLQVQLSIRT) from the G domain of the laminin alpha1 chain*. J Biol Chem, 2001. **276**(25): p. 22077-85.
8. Ponce, M.L., M. Nomizu, and H.K. Kleinman, *An angiogenic laminin site and its antagonist bind through the alpha(v)beta3 and alpha5beta1 integrins*. Faseb j, 2001. **15**(8): p. 1389-97.
9. Kuratomi, Y., et al., *Laminin gamma 1 chain peptide, C-16 (KAFDITYVRLKF), promotes migration, MMP-9 secretion, and pulmonary metastasis of B16-F10 mouse melanoma cells*. Br J Cancer, 2002. **86**(7): p. 1169-73.
